# Supplementary material for: Soft, ternary, X- and gamma-ray shielding materials: paraffin-based iron-encapsulated carbon nanotube nanocomposites
Source: Royal Society of Chemistry journal article supplement (doi:10.1039/d4ma00359d), 2024-01-01
Supplement: d4ma00359d1.pdf [file d4ma00359d1.pdf]

## Supporting Information

### Soft, ternary, X- and gamma-ray shielding materials: paraffin-based iron-encapsulated carbon nanotube nanocomposites †

Jolanta Sobczak,<sup>a</sup> Adrian Truszkiewicz,<sup>b</sup> Krzysztof Cwynar,<sup>c</sup> Szymon Ruczka,<sup>d,e</sup> Anna Kolanowska,<sup>c,d</sup> Rafał G. Jędrzyak,<sup>d,e</sup> Sylwia Waśkiewicz,<sup>f</sup> Marzena Dzida,<sup>c</sup> Sławomir Boncel,<sup>\*d,e</sup> and Gawęł Żyła,<sup>\*g</sup>

#### Abstract

In the field of radiological protection, there is a growing interest in nano- and microcomposites due to their unique physicochemical properties, flexibility in the component selection (the base ingredient as well as the fillers), and lower toxicity in comparison to the lead- (Pb-based) ones. In this study, we manufactured paraffin-based composites with different concentrations of iron-encapsulated multi-walled carbon nanotubes (Fe@MWCNTs) (10 and 20 wt.%), which were prone to shape change at the average room temperature. Long Fe@MWCNT arrays were synthesized by catalytic chemical vapor deposition (c-CVD) using the saturated (at 293.15 K) toluene solution of ferrocene (FeCp<sub>2</sub>) (9.6 wt.%) as a feedstock toward the highest efficiency of a complete Fe-encapsulation. The experimental data indicate that the shielding properties against gamma- and X-ray radiation are influenced by the filler concentration – the higher CNT content resulted in a greater ability to attenuate incident ionizing radiation. Finally, Fe@MWCNT-paraffin composites demonstrated corrosion resistance, as they did not react with 1 M aqueous solutions of NaCl, NaOH, and HCl.

<sup>a</sup> Doctoral School of the Rzeszów University of Technology, Rzeszów University of Technology, Powstańców Warszawy 12, 35-959 Rzeszów, Poland.

<sup>b</sup> Department of Photomedicine and Physical Chemistry, Medical College of University of Rzeszów, University of Rzeszów, Warzywna 1A Street, 35-310 Rzeszów, Poland.

<sup>c</sup> Institute of Chemistry, University of Silesia in Katowice, Szkolna 9, 40-006 Katowice, Poland

<sup>d</sup> Department of Organic Chemistry, Bioorganic Chemistry and Biotechnology, Silesian University of Technology, Krzywoustego 4, 44-100 Gliwice, Poland; E-mail: Sławomir.Boncel@polsl.pl.

<sup>e</sup> Centre for Organic and Nanohybrid Electronics (CONE), Silesian University of Technology, Konarskiego 22B, 44-100 Gliwice, Poland; E-mail: Sławomir.Boncel@polsl.pl.

<sup>f</sup> Department of Physical Chemistry and Technology of Polymers, Silesian University of Technology, ks. Marcina Strzody 9, 44-100 Gliwice, Poland.

<sup>g</sup> Department of Physics and Medical Engineering, Rzeszów University of Technology, Powstańców Warszawy 6, 35-959 Rzeszów, Poland; E-mail: gzyła@prz.edu.pl

Optical micrographs, EDX spectra

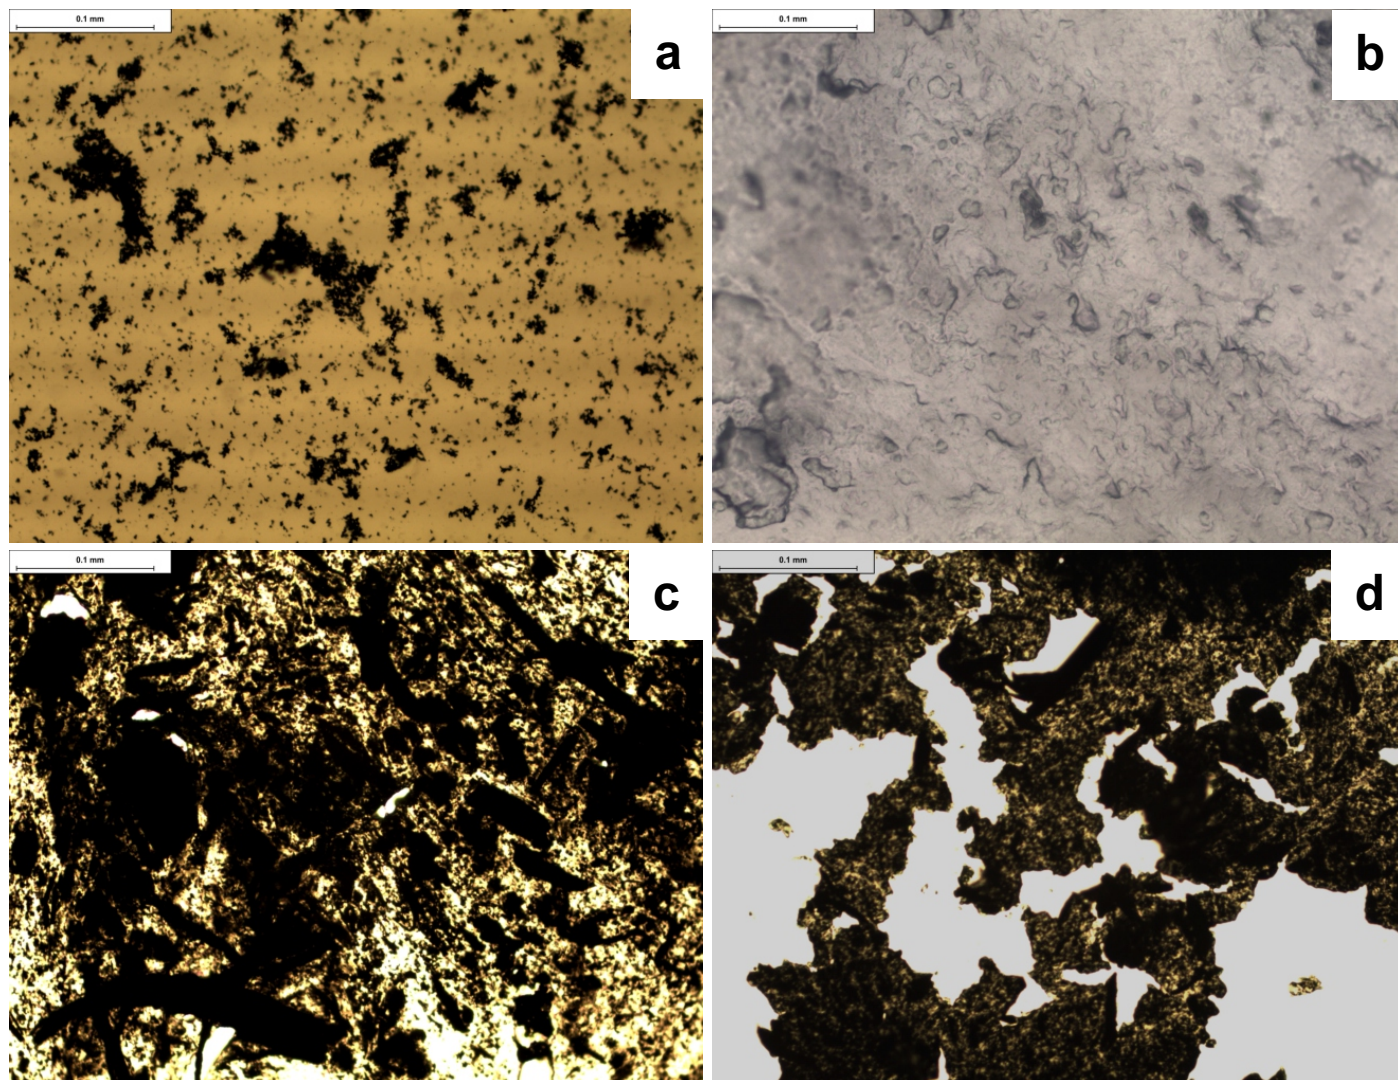

Fig. S1: Optical micrographs of: Fe@MWCNTs (a), neat paraffin (b), Paraffin + 10 wt.% Fe@MWCNT (c), and Paraffin + 20 wt.% Fe@MWCNT (d) composites

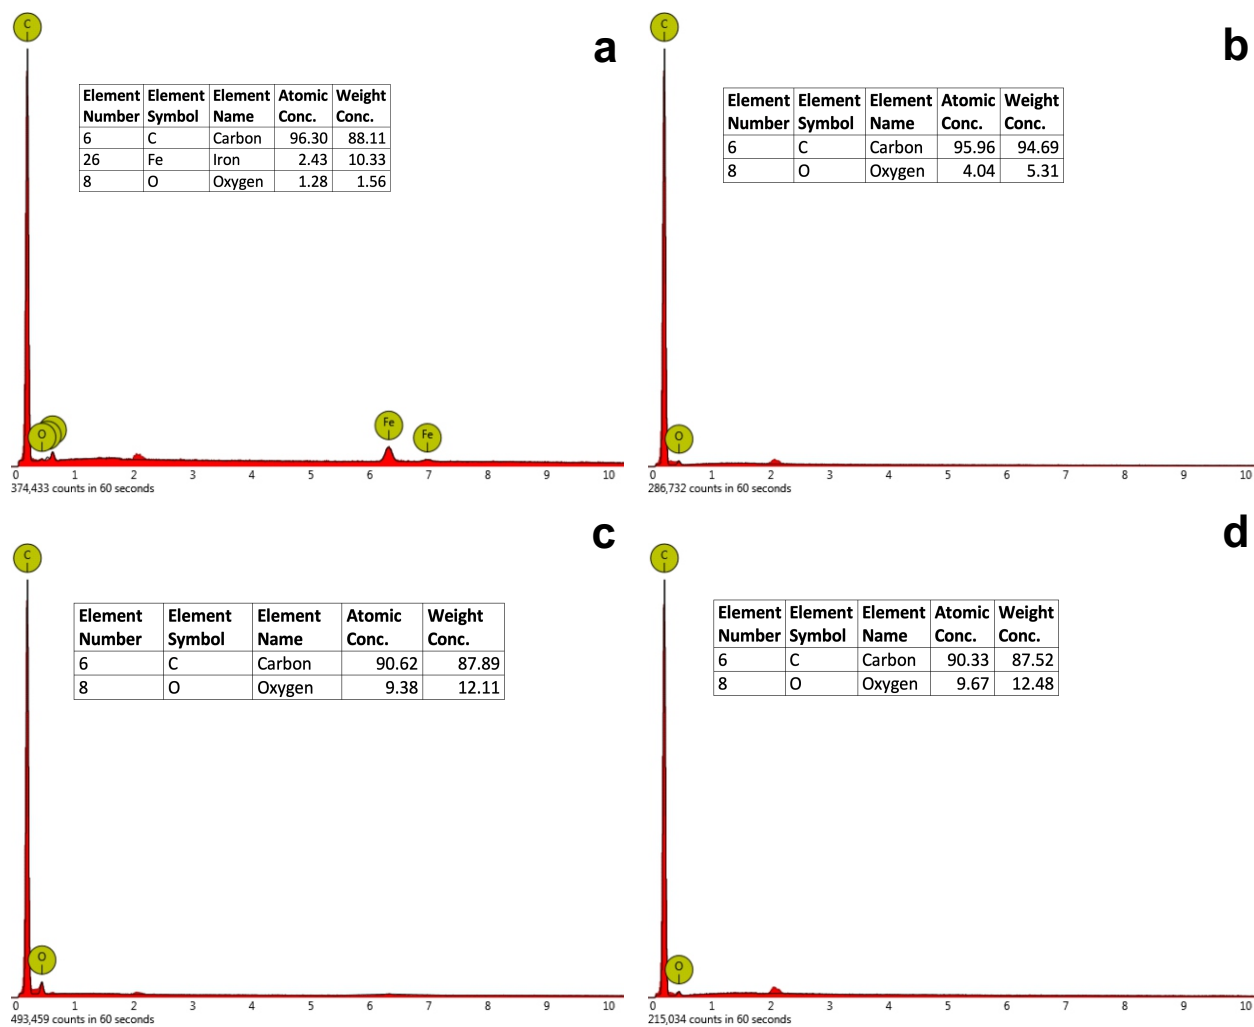

Fig. S2: EDX spectra of Fe@MWCNTs (a), neat paraffin (b), Paraffin + 10 wt.% Fe@MWCNT (c), and Paraffin + 20 wt.% Fe@MWCNT (d) composites. Field of view: 26.9  $\mu\text{m}$ , Mode: 15 kV – Point, Detector: backscattered electron detector.

## Rheological properties

Table S1: Storage modulus and loss modulus for pure paraffin samples and composites with Fe@MWCNTs addition in a function of strain,  $f = 1$  Hz,  $T = 309.75$  K

| Strain   | Paraffin  |          | Paraffin + 10 wt% Fe@MWCNTs |           | Paraffin + 20 wt% Fe@MWCNTs |           |
|----------|-----------|----------|-----------------------------|-----------|-----------------------------|-----------|
|          | $G'$      | $G''$    | $G'$                        | $G''$     | $G'$                        | $G''$     |
| [-]      | [Pa]      | [Pa]     | [Pa]                        | [Pa]      | [Pa]                        | [Pa]      |
| 0,001006 | 110900    | 42823,33 | 675666,67                   | 256600    | 709933,33                   | 258266,67 |
| 0,001273 | 111233,33 | 42593,33 | 682166,67                   | 251666,67 | 721333,33                   | 263466,67 |
| 0,001615 | 112466,67 | 42486,67 | 683933,33                   | 255700    | 749033,33                   | 268466,67 |
| 0,00204  | 113633,33 | 42420    | 690900                      | 255133,33 | 764000                      | 271833,33 |
| 0,002591 | 113600    | 42876,67 | 690600                      | 255700    | 769966,67                   | 270600    |
| 0,003277 | 114333,33 | 43173,33 | 693533,33                   | 255366,67 | 772333,33                   | 270100    |
| 0,00414  | 114933,33 | 42920    | 692866,67                   | 253400    | 774566,67                   | 270366,67 |
| 0,005243 | 114766,67 | 42666,67 | 694300                      | 251100    | 775966,67                   | 269033,33 |
| 0,006644 | 115000    | 42693,33 | 691433,33                   | 251600    | 776700                      | 269133,33 |
| 0,008417 | 115566,67 | 43163,33 | 688900                      | 249866,67 | 777200                      | 270566,67 |
| 0,01066  | 114100    | 43153,33 | 686833,33                   | 250533,33 | 776766,67                   | 269100    |
| 0,0135   | 113170    | 43273,33 | 681200                      | 250233,33 | 773466,67                   | 269266,67 |
| 0,0171   | 111893,33 | 43386,67 | 673200                      | 249600    | 769200                      | 269200    |
| 0,02165  | 109780    | 43566,67 | 662800                      | 249100    | 762400                      | 269000    |
| 0,02742  | 104696,67 | 44410    | 649300                      | 248566,67 | 754566,67                   | 268233,33 |
| 0,03473  | 95836,67  | 45236,67 | 631833,33                   | 247566,67 | 743700                      | 267900    |
| 0,04397  | 82200     | 45293,33 | 609000                      | 246766,67 | 729666,67                   | 267300    |
| 0,05568  | 65810     | 44153,33 | 578033,33                   | 246266,67 | 711700                      | 266433,33 |
| 0,07052  | 49496,67  | 40686,67 | 535033,33                   | 246666,67 | 688400                      | 265566,67 |
| 0,08931  | 38950     | 36643,33 | 475233,33                   | 246966,67 | 657033,33                   | 265666,67 |
| 0,1131   | 30006,67  | 32413,33 | 402500                      | 243000    | 609600                      | 267800    |
| 0,1432   | 22406,67  | 28353,33 | 325233,33                   | 231266,67 | 531700                      | 274900    |
| 0,1814   | 16080     | 23773,33 | 257333,33                   | 210633,33 | 416933,33                   | 282033,33 |
| 0,2297   | 11800     | 19840    | 203766,67                   | 184266,67 | 305633,33                   | 268400    |
| 0,2909   | 8676,67   | 16583,33 | 163333,33                   | 157433,33 | 222966,67                   | 235433,33 |
| 0,3684   | 6627,67   | 14120    | 131600                      | 133233,33 | 171666,67                   | 195166,67 |
| 0,4665   | 4852,33   | 11743,33 | 105586,67                   | 112500    | 140633,33                   | 157200    |
| 0,5907   | 3617      | 9780,33  | 83393,33                    | 95506,67  | 116800                      | 127700    |
| 0,7481   | 2483,33   | 7926,67  | 64613,33                    | 81376,67  | 90120                       | 108866,67 |
| 0,9474   | 1844,67   | 6682     | 49263,33                    | 69090     | 67010                       | 92830     |
| 1,2      | 1356,67   | 5746     | 37460                       | 58503,33  | 50140                       | 77520     |
| 1,519    | 1000,33   | 4974,67  | 28026,67                    | 49316,67  | 37533,33                    | 64500     |
| 1,924    | 739,83    | 4299     | 20760                       | 41443,33  | 27846,67                    | 53623,33  |
| 2,437    | 554,9     | 3765,33  | 15203,33                    | 34753,33  | 20490                       | 44533,33  |
| 3,086    | 412,97    | 3287     | 10979                       | 29090     | 14973,33                    | 36900     |
| 3,908    | 307,2     | 2901     | 7867,33                     | 24323,33  | 10900                       | 30580     |
| 4,949    | 229,27    | 2585,67  | 5657                        | 20326,67  | 7887                        | 25436,67  |
| 6,267    | 167,83    | 2312,33  | 4188,33                     | 16976,67  | 5717,67                     | 21186,67  |
| 7,936    | 119,1     | 2057     | 3125,33                     | 14246,67  | 4258,33                     | 17673,33  |
| 10,05    | 81,67     | 1828,33  | 2330                        | 12000     | 3213,67                     | 14783,33  |

Table S2: Storage modulus and loss modulus for pure paraffin samples and composites with Fe@MWCNTs addition in a function of temperature,  $\gamma = 0.01\%$ ,  $f = 1$  Hz

| $T$<br>[K] | Paraffin     |               | Paraffin + 10 wt% Fe@MWCNTs |               | Paraffin + 20 wt% Fe@MWCNTs |               |
|------------|--------------|---------------|-----------------------------|---------------|-----------------------------|---------------|
|            | $G'$<br>[Pa] | $G''$<br>[Pa] | $G'$<br>[Pa]                | $G''$<br>[Pa] | $G'$<br>[Pa]                | $G''$<br>[Pa] |
| 288,15     | 3181666,67   | 1257000       | 11650000                    | 3446666,67    | 14763300                    | 4641333,33    |
| 289,15     | 2798333,33   | 1167733,33    | 10624000                    | 3270000       | 13280000                    | 4341333,33    |
| 290,15     | 2374666,67   | 1065033,33    | 9463333,33                  | 3078000       | 11175000                    | 3936500       |
| 291,15     | 1919333,33   | 942433,33     | 8141333,33                  | 2816666,67    | 10207300                    | 3883666,67    |
| 292,15     | 1466333,33   | 804200        | 6949333,33                  | 2568000       | 8127000                     | 3343000       |
| 293,15     | 1110333,33   | 682466,67     | 5972000                     | 2348666,67    | 6693333,33                  | 2949000       |
| 294,15     | 780633,33    | 537400        | 4719000                     | 1939333,33    | 5377000                     | 2521333,33    |
| 295,15     | 551400       | 405000        | 3923666,67                  | 1630000       | 4226000                     | 2072000       |
| 296,15     | 454833,33    | 341066,67     | 3350666,67                  | 1411000       | 3574000                     | 1803666,67    |
| 297,15     | 390766,67    | 298866,67     | 3040333,33                  | 1331000       | 3081000                     | 1583000       |
| 298,15     | 337033,33    | 260433,33     | 2631333,33                  | 1198000       | 2630666,67                  | 1378333,33    |
| 299,15     | 292733,33    | 220833,33     | 1956000                     | 1011500       | 2238666,67                  | 1188666,67    |
| 300,15     | 256233,33    | 194733,33     | 2014000                     | 1014333,33    | 1956333,33                  | 1095533,33    |
| 301,15     | 217066,67    | 168900        | 1967333,33                  | 883000        | 1640500                     | 932750        |
| 302,15     | 184566,67    | 149966,67     | 1806666,67                  | 801766,67     | 1519333,33                  | 877333,33     |
| 303,15     | 172033,33    | 118390        | 1316000                     | 700100        | 1326000                     | 777133,33     |
| 304,15     | 142700       | 107500        | 1434300                     | 676033,33     | 1169000                     | 685200        |
| 305,15     | 122933,33    | 91480         | 1374733,33                  | 614900        | 1029266,67                  | 626600        |
| 306,15     | 113076,67    | 74526,67      | 1255466,67                  | 567766,67     | 1002950                     | 531900        |
| 307,15     | 111200       | 67360         | 1137066,67                  | 506933,33     | 878433,33                   | 485833,33     |
| 308,15     | 88580        | 53210         | 1073233,33                  | 446866,67     | 877266,67                   | 388433,33     |
| 309,15     | 67255        | 42930         | 719700                      | 334750        | 813566,67                   | 345700        |
| 310,15     | 69100        | 41773,33      | 954266,67                   | 349200        | 864766,67                   | 286966,67     |
| 311,15     | 66656,67     | 37536,67      | 924533,33                   | 307633,33     | 766900                      | 259400        |
| 312,15     | 79606,67     | 31796,67      | 980066,67                   | 268700        | 768900                      | 239266,67     |
| 313,15     | 75136,67     | 27976,67      | 926800                      | 255033,33     | 745550                      | 213700        |
| 314,15     | 73215        | 36025         | 875133,33                   | 244033,33     | 682666,67                   | 189433,33     |
| 315,15     | 42870        | 21960         | 837866,67                   | 226166,67     | 624200                      | 167666,67     |
| 316,15     | 46826,67     | 25546,67      | 785133,33                   | 216033,33     | 568933,33                   | 150566,67     |
| 317,15     | 30150        | 19180         | 727733,33                   | 197300        | 529700                      | 117500        |
| 318,15     | 31490        | 19840         | 671833,33                   | 190500        | 450833,33                   | 123800        |
| 319,15     | 33825        | 17300         | 658050                      | 177350        | 410050                      | 98370         |
| 320,15     | 22210        | 12472         | 575400                      | 156706,67     | 345900                      | 95530         |
| 321,15     | 21066,67     | 12827,67      | 543666,67                   | 137170        | 292200                      | 80830         |
| 322,15     | 10280        | 5997          | 618450                      | 155750        | 245966,67                   | 70756,67      |
| 323,15     | 12776,67     | 7885,33       | 447200                      | 127396,67     | 205866,67                   | 55960         |
| 324,15     | 9542,33      | 4396,67       | 400800                      | 105930        | 162200                      | 52103,33      |
| 325,15     | 6490         | 3385,67       | 391250                      | 104820        | 128850                      | 37950         |
| 326,15     | 5485,67      | 2594,33       | 323133,33                   | 89870         | 98370                       | 32553,33      |
| 327,15     | 3534,67      | 1926          | 291166,67                   | 72330         | 73860                       | 26996,67      |
| 328,15     | 2152,33      | 961,33        | 263733,33                   | 66833,33      | 61600                       | 17476,67      |
| 329,15     | 1252,33      | 493,6         | 242263,33                   | 52390         | 49190                       | 16556,67      |
| 330,15     | 720,33       | 294,63        | 228620                      | 48856,67      | 42166,67                    | 12223,33      |
| 331,15     | 525,9        | 202,45        | 214873,33                   | 44176,67      | 37603,33                    | 10959,33      |
| 332,15     | 435,55       | 135,2         | 208670                      | 42000         | 40340                       | 9624,33       |
| 333,15     | 345,05       | 108,12        | 203156,67                   | 39990         | 39523,33                    | 8913,67       |
| 334,15     | 285,55       | 81,04         | 199360                      | 38300         | 39840                       | 8387,67       |
| 335,15     | 224,45       | 62,48         | 203170                      | 34916,67      | 37473,33                    | 8100,33       |
| 336,15     | 165,8        | 45,36         | 231185                      | 39140         | 38543,33                    | 7313,67       |
| 337,15     | 117,35       | 32,45         | 194210                      | 33453,33      | 36643,33                    | 6883,67       |
| 338,15     | 91,2         | 23,84         | 191536,67                   | 31572         | 35370                       | 6633,33       |

## Shielding properties – gamma ray

Table S3: The summary of experimental data for the pure paraffin and manufactured composites with 10 and 20 wt.% of Fe@MWCNT addition presented in the form of the ratio of the number of counts for a given layer thickness ( $N_{\text{reduced layer}}$ ) to the number of counts coming from the  $^{60}\text{Co}$  source ( $N_{\text{reduced source}}$ ) as the average of three measurement series for each composite sample

| $x$ (cm) | Paraffin | Paraffin + 10 wt% Fe@MWCNTs | Paraffin + 20 wt% Fe@MWCNTs |
|----------|----------|-----------------------------|-----------------------------|
| 0        | 1        | 1                           | 1                           |
| 2        | 0.942    | 0.921                       | 0.919                       |
| 4        | 0.827    | 0.823                       | 0.822                       |
| 6        | 0.769    | 0.734                       | 0.724                       |
| 8        | 0.704    | 0.656                       | 0.666                       |
| 10       | 0.631    | 0.623                       | 0.601                       |
| 12       | 0.569    | 0.561                       | 0.541                       |
| 14       | 0.521    | 0.483                       | 0.472                       |
| 16       | 0.490    | 0.465                       | 0.443                       |
| 18       | 0.451    | 0.413                       | 0.395                       |
| 20       | 0.406    | 0.359                       | 0.333                       |
| 22       | 0.375    | 0.341                       | 0.321                       |
| 24       | 0.325    | 0.319                       | 0.287                       |
| 26       | 0.293    | 0.282                       | 0.260                       |

## Shielding properties – X-ray

Table S4: The data summary of X-ray shielding ability for the composites with 10 and 20 wt.% addition of Fe@MWCNTs and for the pure paraffin presented in the form of the ratio of the signal intensity of given material layer thickness ( $I_{\text{layer sample}}$ ) to the signal intensity for aired field ( $I_{\text{air}}$ ) at 70 kV voltage

| $x$ (cm) | Paraffin | Paraffin + 10 wt% Fe@MWCNTs | Paraffin + 20 wt% Fe@MWCNTs |
|----------|----------|-----------------------------|-----------------------------|
| 0        | 1        | 1                           | 1                           |
| 2        | 0.685    | 0.678                       | 0.670                       |
| 4        | 0.489    | 0.453                       | 0.425                       |
| 6        | 0.346    | 0.298                       | 0.266                       |
| 8        | 0.240    | 0.197                       | 0.168                       |

Table S5: The data summary of X-ray shielding ability for the composites with 10 and 20 wt.% addition of Fe@MWCNTs and for the pure paraffin presented in the form of the ratio of the signal intensity of given material layer thickness ( $I_{\text{layer sample}}$ ) to the signal intensity for aired field ( $I_{\text{air}}$ ) at 80 kV voltage

| $x$ (cm) | Paraffin | Paraffin + 10 wt% Fe@MWCNTs | Paraffin + 20 wt% Fe@MWCNTs |
|----------|----------|-----------------------------|-----------------------------|
| 0        | 1        | 1                           | 1                           |
| 2        | 0.892    | 0.855                       | 0.854                       |
| 4        | 0.654    | 0.594                       | 0.565                       |
| 6        | 0.468    | 0.398                       | 0.363                       |
| 8        | 0.333    | 0.269                       | 0.235                       |

Table S6: The data summary of X-ray shielding ability for the composites with 10 and 20 wt.% addition of Fe@MWCNTs and for the pure paraffin presented in the form of the ratio of the signal intensity of given material layer thickness ( $I_{\text{layer sample}}$ ) to the signal intensity for aired field ( $I_{\text{air}}$ ) at 90 kV voltage

| $x$ (cm) | Paraffin | Paraffin + 10 wt% Fe@MWCNTs | Paraffin + 20 wt% Fe@MWCNTs |
|----------|----------|-----------------------------|-----------------------------|
| 0        | 1        | 1                           | 1                           |
| 2        | 0.999    | 0.999                       | 0.999                       |
| 4        | 0.936    | 0.867                       | 0.832                       |
| 6        | 0.687    | 0.596                       | 0.549                       |
| 8        | 0.495    | 0.411                       | 0.363                       |

Table S7: The data summary of X-ray shielding ability for the composites with 10 and 20 wt.% addition of Fe@MWCNTs and for the pure paraffin presented in the form of the ratio of the signal intensity of given material layer thickness ( $I_{\text{layer sample}}$ ) to the signal intensity for aired field ( $I_{\text{air}}$ ) at 100 kV voltage

| $x$ (cm) | Paraffin | Paraffin + 10 wt% Fe@MWCNTs | Paraffin + 20 wt% Fe@MWCNTs |
|----------|----------|-----------------------------|-----------------------------|
| 0        | 1        | 1                           | 1                           |
| 2        | 0.999    | 0.999                       | 0.999                       |
| 4        | 0.999    | 0.999                       | 0.999                       |
| 6        | 0.915    | 0.808                       | 0.751                       |
| 8        | 0.673    | 0.567                       | 0.505                       |

Table S8: The data summary of X-ray shielding ability for the composites with 10 and 20 wt.% addition of Fe@MWCNTs and for the pure paraffin presented in the form of the ratio of the signal intensity of given material layer thickness ( $I_{\text{layer sample}}$ ) to the signal intensity for aired field ( $I_{\text{air}}$ ) at 110 kV voltage

| $x$ (cm) | Paraffin | Paraffin + 10 wt% Fe@MWCNTs | Paraffin + 20 wt% Fe@MWCNTs |
|----------|----------|-----------------------------|-----------------------------|
| 0        | 1        | 1                           | 1                           |
| 2        | 0.999    | 0.999                       | 0.999                       |
| 4        | 0.999    | 0.999                       | 0.999                       |
| 6        | 0.999    | 0.999                       | 0.973                       |
| 8        | 0.865    | 0.741                       | 0.666                       |

Table S9: The data summary of X-ray shielding ability for the composites with 10 and 20 wt.% addition of Fe@MWCNTs and for the pure paraffin presented in the form of the ratio of the signal intensity of given material layer thickness ( $I_{\text{layer sample}}$ ) to the signal intensity for aired field ( $I_{\text{air}}$ ) at 120 kV voltage

| $x$ (cm) | Paraffin | Paraffin + 10 wt% Fe@MWCNTs | Paraffin + 20 wt% Fe@MWCNTs |
|----------|----------|-----------------------------|-----------------------------|
| 0        | 1        | 1                           | 1                           |
| 2        | 0.999    | 0.999                       | 0.999                       |
| 4        | 0.999    | 0.999                       | 0.999                       |
| 6        | 0.999    | 0.999                       | 0.999                       |
| 8        | 0.999    | 0.922                       | 0.836                       |

Table S10: The data summary of X-ray shielding ability for the composites with 10 and 20 wt.% addition of Fe@MWCNTs and for the pure paraffin presented in the form of the ratio of the signal intensity of given material layer thickness ( $I_{\text{layer sample}}$ ) to the signal intensity for aired field ( $I_{\text{air}}$ ) at 130 kV voltage

| $x$ (cm) | Paraffin | Paraffin + 10 wt% Fe@MWCNTs | Paraffin + 20 wt% Fe@MWCNTs |
|----------|----------|-----------------------------|-----------------------------|
| 0        | 1        | 1                           | 1                           |
| 2        | 0.999    | 0.999                       | 0.999                       |
| 4        | 0.999    | 0.999                       | 0.999                       |
| 6        | 0.999    | 0.999                       | 0.999                       |
| 8        | 0.999    | 0.999                       | 0.986                       |



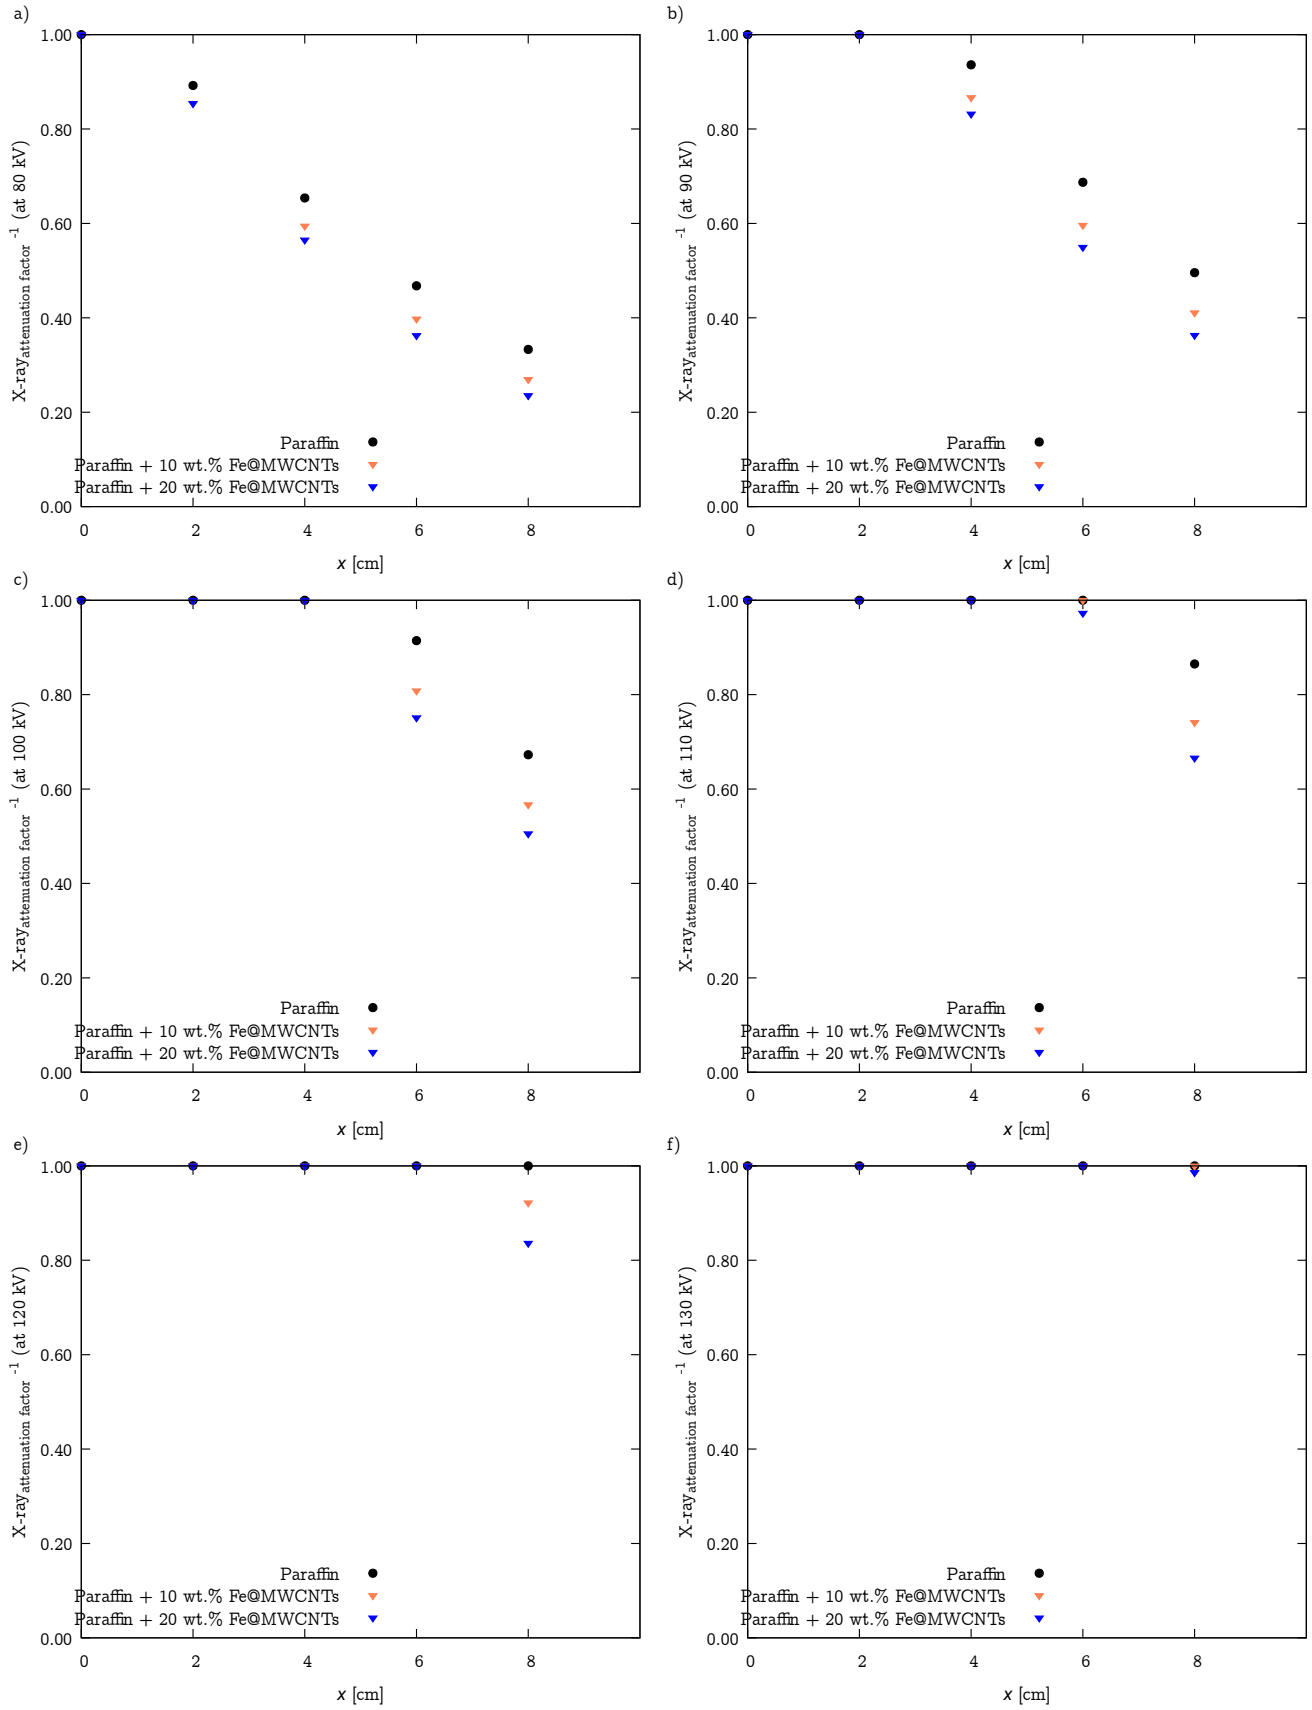

Fig. S3: The dependence of X-ray<sub>attenuation factor</sub><sup>-1</sup> for the manufactured composites with 10 wt.% and 20 wt.% of Fe@MWCNTs addition and for the pure paraffin at 80, 90, 100, 110, 120 and 130 kV voltage.
